# Supplementary material for: A retrospective analysis to identify predictors of COPD-related rehospitalization
Source: PubMed Central journal article supplement (PMC4851802; doi:10.1186/s12890-016-0231-3), 2016-04-30
Supplement: 12890_2016_231_MOESM1_ESM.pdf [file 12890_2016_231_MOESM1_ESM.pdf]

**Additional file 1: Table S1** Analysis variables used for predicting COPD-related rehospitalization

| Category and timeframe                       | Description                                                                                                                                        |
|----------------------------------------------|----------------------------------------------------------------------------------------------------------------------------------------------------|
| Demographics: pre-index<br>(-360 to -1 days) | Most frequent payer type of Medicare (vs all other [commercial insurance, Medicaid, cash, and missing/unknown])                                    |
|                                              | Smoking cessation products                                                                                                                         |
|                                              | Any indication of tobacco/smoking issues (diagnosis [history/use disorder] or HCPCS or CPT codes for past or present smoking or smoking cessation) |
| Demographics: index hospitalization          | Patient age at time of discharge from index event                                                                                                  |
|                                              | Gender                                                                                                                                             |
|                                              | Index hospital region – North (vs all other)                                                                                                       |
|                                              | Index hospital region – South (vs all other)                                                                                                       |
|                                              | Index hospital region – East (vs all other)                                                                                                        |
|                                              | Index hospital region – West (vs all other)                                                                                                        |
| During index hospitalization                 | Anticholinergic (ipratropium or tiotropium) treatment (any route)                                                                                  |
|                                              | Bronchodilator <sup>a</sup> treatment, excluding anticholinergics and inhaled steroids (any route)                                                 |
|                                              | Markers for presence of secondary diagnoses for acute respiratory failure (518.81) <sup>b</sup> on the index hospitalization                       |
|                                              | Presence of secondary diagnoses for heart failure (428.0x) <sup>b</sup>                                                                            |
|                                              | Number of days for index hospitalization                                                                                                           |
|                                              | Index admission through Emergency Room (vs all other)                                                                                              |
|                                              | Number of beds in index event hospital: 1–99 (vs all other bed sizes)                                                                              |
|                                              | Number of beds in index event hospital: 100–199 (vs all other bed sizes)                                                                           |
|                                              | Number of beds in index event hospital: 200–299 (vs all other bed sizes)                                                                           |
|                                              | Number of beds in index event hospital: 300–499 (vs all other bed sizes)                                                                           |
|                                              | Number of beds in index event hospital: 500 and up (vs all other bed sizes)                                                                        |
|                                              | Number of beds in index event hospital: unknown (vs all other bed sizes)                                                                           |

|                                                                        |                                                                                                                                                                                                                                   |
|------------------------------------------------------------------------|-----------------------------------------------------------------------------------------------------------------------------------------------------------------------------------------------------------------------------------|
|                                                                        | Number of COPD-related drug categories appearing in index hospitalization from the following: any route anticholinergics (ipratropium or tiotropium), any route other bronchodilators <sup>a</sup> , inhaled steroids (range 0–3) |
|                                                                        | Indications of nebulizer use during index hospitalization (Yes/No)                                                                                                                                                                |
|                                                                        | Indications of oxygen therapy during index hospitalization (Yes/No)                                                                                                                                                               |
|                                                                        | Steroid treatment (any route)                                                                                                                                                                                                     |
|                                                                        | Inhaled steroid treatment                                                                                                                                                                                                         |
|                                                                        | Non-inhaled (oral, injectable) steroid treatment                                                                                                                                                                                  |
|                                                                        | Teaching (versus not)                                                                                                                                                                                                             |
|                                                                        | Sum of CDM resource charges for the index cluster                                                                                                                                                                                 |
|                                                                        | Urban index hospital (vs rural)                                                                                                                                                                                                   |
| Comorbidities <sup>b</sup> (by diagnosis): pre-index (–360 to –1 days) | Anxiety (300.0x, 300.2x, 300.3x, 306.9x, 308.xx, 309.2x, 309.4x, 309.9x)                                                                                                                                                          |
|                                                                        | Asthma (493.xx)                                                                                                                                                                                                                   |
|                                                                        | Charlson Comorbidity Index (weighted)                                                                                                                                                                                             |
|                                                                        | Heart failure (428.xx)                                                                                                                                                                                                            |
|                                                                        | Diabetes (250.xx)                                                                                                                                                                                                                 |
|                                                                        | Depression (296.2x, 296.3x, 296.9x, 309.0, 300.4, 311.xx)                                                                                                                                                                         |
|                                                                        | Infectious and parasitic diseases (001–139)                                                                                                                                                                                       |
|                                                                        | Neoplasms (140–239)                                                                                                                                                                                                               |
|                                                                        | Endocrine (240–279)                                                                                                                                                                                                               |
|                                                                        | Blood diseases (280–289)                                                                                                                                                                                                          |
|                                                                        | Mental disorders (290–319)                                                                                                                                                                                                        |
|                                                                        | Nervous system and sense organs diseases (320–389)                                                                                                                                                                                |
|                                                                        | Circulatory system diseases (390–459)                                                                                                                                                                                             |
|                                                                        | Respiratory system diseases (460–519)                                                                                                                                                                                             |
|                                                                        | Digestive system diseases (520–579)                                                                                                                                                                                               |
|                                                                        | Genitourinary system diseases (580–629)                                                                                                                                                                                           |
|                                                                        | Skin and subcutaneous tissue diseases (680–709)                                                                                                                                                                                   |
|                                                                        | Musculoskeletal system and connective tissue diseases (710–739)                                                                                                                                                                   |
|                                                                        | Symptoms, signs, and ill-defined conditions (780–799)                                                                                                                                                                             |
|                                                                        | Injury and poisoning (800–999)                                                                                                                                                                                                    |

|                                                                                                                 |                                                                           |
|-----------------------------------------------------------------------------------------------------------------|---------------------------------------------------------------------------|
|                                                                                                                 | Supplementary classification (V01–V82)                                    |
|                                                                                                                 | Dyspnea (786.xx)                                                          |
|                                                                                                                 | Hypertension                                                              |
|                                                                                                                 | Hypoxia (799.02)                                                          |
|                                                                                                                 | Ischemic heart disease                                                    |
|                                                                                                                 | Osteoporosis (733.0x)                                                     |
|                                                                                                                 | Pneumonia or influenza (480.xx–488.xx)                                    |
|                                                                                                                 | Pulmonary vascular disease (415.xx–417.xx)                                |
|                                                                                                                 | Stroke (430.xx–438.xx)                                                    |
| Comorbidities <sup>b</sup> (by diagnosis): pre-index: –360 to –1 days, each quarter (Q1–Q4), and –30 to –1 days | Pneumonia or influenza (480.xx–488.xx)                                    |
| Comorbidities <sup>b</sup> (by diagnosis): index hospitalization                                                | Markers for presence of secondary diagnoses for pneumonia (480.xx–487.8x) |
| Comorbidities (by pharmaceutical treatment): pre-index (–360 to –1 days)                                        | Number of days prescription COPD medications were available               |
|                                                                                                                 | Antiarrhythmics (Yes/No)                                                  |
|                                                                                                                 | Antiasthmatics (Yes/No)                                                   |
|                                                                                                                 | Anticoagulants (Yes/No)                                                   |
|                                                                                                                 | Antihyperglycemics (Yes/No)                                               |
|                                                                                                                 | Antineoplastics (Yes/No)                                                  |
|                                                                                                                 | Antiparkinson drugs (Yes/No)                                              |
|                                                                                                                 | Autonomic drugs (Yes/No)                                                  |
|                                                                                                                 | Biologicals (Yes/No)                                                      |
|                                                                                                                 | Blood (Yes/No)                                                            |
|                                                                                                                 | Cardiac drugs (Yes/No)                                                    |
|                                                                                                                 | Cardiovascular drugs (Yes/No)                                             |
|                                                                                                                 | Central nervous system drugs (Yes/No)                                     |
|                                                                                                                 | Diuretics (Yes/No)                                                        |
|                                                                                                                 | Gastrointestinal drugs (Yes/No)                                           |
|                                                                                                                 | Hormones (Yes/No)                                                         |
| Immunosuppressants (Yes/No)                                                                                     |                                                                           |
| Psychotherapeutics drugs (Yes/No)                                                                               |                                                                           |
| Thyroid preparations (Yes/No)                                                                                   |                                                                           |

|                                                                                                     |                                                                                                                                                                                                  |
|-----------------------------------------------------------------------------------------------------|--------------------------------------------------------------------------------------------------------------------------------------------------------------------------------------------------|
|                                                                                                     | Number of different drug classes per patient; including COPD-related classes                                                                                                                     |
|                                                                                                     | Number of different drug classes per patient; excluding COPD-related classes                                                                                                                     |
| Prescription for LABA or SABA: pre-index (–360 to –1 days)                                          | At least one SABA or LABA (any route)                                                                                                                                                            |
|                                                                                                     | Number of quarters during the pre-index period with at least one claim for a LABA (i.e., dispensed, not based on daily markers)                                                                  |
|                                                                                                     | Number of quarters during the pre-index period with at least one claim for a SABA                                                                                                                |
| Prescription for LABA or SABA: pre-index: –360 to –1 days; each quarter (Q1–Q4), and –30 to –1 days | At least one claim for a LABA, any route                                                                                                                                                         |
|                                                                                                     | Percentage of days during each period where LABA were available (based on dispensing date and days' supply as recorded by the pharmacist)                                                        |
|                                                                                                     | Ratio of percentage of days with LABAs to SABAs: formula = $100 \times (\text{number of LABA days}/\text{number of SABA days})$ . Where there was no use of one or the other a zero was assigned |
|                                                                                                     | Indicator variables (Yes/No) for each period where there were any SABA claims                                                                                                                    |
|                                                                                                     | Percentage of days during each period where SABA were available (based on dispensing date and days' supply as recorded by the pharmacist)                                                        |
| Prescription for steroids: pre-index (–360 to –1 days)                                              | Number of quarters where there was at least one claim for a steroid inhaler                                                                                                                      |
|                                                                                                     | Number of quarters where there was at least one claim for a non-inhaled steroid                                                                                                                  |
|                                                                                                     | Steroid (any route)                                                                                                                                                                              |
| Prescription for steroids: pre-index: –360 to –1 days, each quarter (Q1–Q4), and -30 to –1 days     | Indicator variables (Yes/No) for presence of any steroid inhaler claims                                                                                                                          |
|                                                                                                     | Percentage of days during each period where steroid inhalers were available (based on dispensing date and days' supply as recorded by the pharmacist)                                            |
|                                                                                                     | Indicator variables (Yes/No) for presence of any non-inhaled steroid claims                                                                                                                      |
|                                                                                                     | Variables for the percentage of days during each period where non-inhaled steroid were available (based on dispensing date and days' supply as recorded by the pharmacist)                       |
|                                                                                                     | All COPD-related study medicines                                                                                                                                                                 |

|                                                                           |                                                                              |
|---------------------------------------------------------------------------|------------------------------------------------------------------------------|
| COPD-related drug availability: pre-index: – 360 to –1 days, Q12, and Q34 | Albuterol                                                                    |
|                                                                           | Arformoterol                                                                 |
|                                                                           | Beclomethasone                                                               |
|                                                                           | Budesonide with formoterol                                                   |
|                                                                           | Budesonide                                                                   |
|                                                                           | Ciclesonide                                                                  |
|                                                                           | Cortisone acetate                                                            |
|                                                                           | Cromolyn                                                                     |
|                                                                           | Dexamethasone                                                                |
|                                                                           | Dyphylline                                                                   |
|                                                                           | Flunisolide                                                                  |
|                                                                           | Fluticasone with salmeterol                                                  |
|                                                                           | Fluticasone                                                                  |
|                                                                           | Formoterol                                                                   |
|                                                                           | Hydrocortisone                                                               |
|                                                                           | Ipratropium with albuterol                                                   |
|                                                                           | Ipratropium                                                                  |
|                                                                           | Levalbuterol                                                                 |
|                                                                           | Metaproterenol                                                               |
|                                                                           | Methylprednisolone                                                           |
|                                                                           | Mometasone                                                                   |
|                                                                           | Montelukast                                                                  |
|                                                                           | Pirbuterol                                                                   |
|                                                                           | Prednisolone                                                                 |
|                                                                           | Prednisone                                                                   |
|                                                                           | Salmeterol                                                                   |
|                                                                           | Terbutaline                                                                  |
|                                                                           | Tiotropium                                                                   |
|                                                                           | Triamcinolone                                                                |
|                                                                           | Zafirlukast                                                                  |
| Zileuton                                                                  |                                                                              |
| Other respiratory treatments of interest: pre-index (–360 to –1 days)     | At least one prescription or office-based antibiotic (procedure or NDC code) |
|                                                                           | Prescription (NDC) antibiotic                                                |
|                                                                           | Outpatient or office-administered antibiotic                                 |

|                                                     |                                                                                                             |
|-----------------------------------------------------|-------------------------------------------------------------------------------------------------------------|
|                                                     | Number of times a prescription for antibiotics appeared within 3 days after a respiratory-related diagnosis |
|                                                     | Percent of the pre-index period during which prescription COPD medications were available                   |
|                                                     | Influenza or pneumonia vaccine                                                                              |
| Costs utilization: pre-index (-360 to -1 days)      | At least one hospitalization (any reason)                                                                   |
|                                                     | Hospitalization with a COPD ICD-9-CM code present in the primary diagnosis field (Yes/No)                   |
|                                                     | Hospitalization with a respiratory-related ICD-9-CM code in the primary diagnosis field (Yes/No)            |
|                                                     | Number of hospitalizations (any reason)                                                                     |
|                                                     | Number of respiratory-related hospitalizations                                                              |
|                                                     | Primary care specialist during (Yes/No)                                                                     |
|                                                     | Respiratory-related specialist (Yes/No)                                                                     |
|                                                     | Total number of prescription claims in units of 10 (i.e., per 10 prescriptions)                             |
|                                                     | Unknown or missing specialist (Yes/No)                                                                      |
|                                                     | Non-respiratory-related specialist (Yes/No)                                                                 |
| 1-30 days post-discharge from index hospitalization | Presence of at least one claim for an antibiotic (Yes/No)                                                   |
|                                                     | Presence of at least one office visit (Yes/No)                                                              |
|                                                     | At least one claim for an oral steroid (Yes/No)                                                             |

CDM, Charge Description Master; CPT, Current Procedural Terminology; HCPCS, Healthcare Common Procedure Coding System; LABA, long-acting beta-agonist, SABA, short-acting beta-agonist, NDC, National Drug Code; Q1, -360 to -271 days pre-index date; Q2, -270 to -181 days pre-index date; Q3, -180 to -91 days pre-index date; Q4, -90 to -1 days pre-index date; Q12, -360 to -181 days pre-index date; Q34, -180 to -1 days pre-index date.

<sup>a</sup>Albuterol, aminophylline, arformoterol, dyphylline, ephedrine, formoterol, levalbuterol, metaproterenol, montelukast, salmeterol, terbutaline, theophylline, zafirlukast, zileuton.

<sup>b</sup>Disease classifications are based on International Classification of Diseases, 9th Revision, Clinical Modification (ICD-9-CM) codes.
